# Supplementary material
Source: MDPI journal article supplement (https://www.mdpi.com/2073-4395/12/9/2005)
Supplement: s1 [file s1]

Table S1. Results from repeated measures ANOVA of the effects of soil and foliar B fertilization throughout time (year) on leaf gas exchange parameters [ $E$  ( $\text{mmol m}^{-2}\text{s}^{-1}$ ),  $g_s$  ( $\text{mmol m}^{-2}\text{s}^{-1}$ ),  $A$  ( $\mu\text{mol m}^{-2}\text{s}^{-1}$ ), and  $iWUE$  ( $\mu\text{mol mol}^{-1}$ )],  $RWC$  (%) and  $EL$  (%)

|                               | <b>E</b>     | <b><math>g_s</math></b> | <b>A</b>     | <b><math>iWUE</math></b> | <b>RWC</b>   | <b>EL</b>    |
|-------------------------------|--------------|-------------------------|--------------|--------------------------|--------------|--------------|
| <b>Within-subject factors</b> |              |                         |              |                          |              |              |
| Year                          | <b>0.000</b> | <b>0.000</b>            | <b>0.000</b> | <b>0.003</b>             | <b>0.000</b> | <b>0.002</b> |
| Year x Soil                   | <b>0.044</b> | 0.271                   | 0.088        | 0.688                    | 0.253        | 0.780        |
| Year x Foliar                 | <b>0.022</b> | <b>0.002</b>            | 0.078        | 0.055                    | <b>0.000</b> | <b>0.003</b> |
| Year x Soil x Foliar          | 0.408        | 0.543                   | 0.550        | 0.613                    | 0.053        | 0.498        |
| <b>Between-group factors</b>  |              |                         |              |                          |              |              |
| Soil                          | <b>0.002</b> | <b>0.000</b>            | <b>0.004</b> | 0.058                    | 0.544        | 0.891        |
| Foliar                        | <b>0.000</b> | <b>0.000</b>            | <b>0.000</b> | 0.590                    | <b>0.012</b> | <b>0.000</b> |
| Soil x Foliar                 | <b>0.000</b> | <b>0.000</b>            | <b>0.001</b> | 0.069                    | 0.411        | 0.085        |

Significant differences are marked in bold

Table S2. Results from repeated measures ANOVA of the effects of soil and foliar B fertilization throughout time (year) on leaf photosynthetic pigments (chl *a*, chl *b*, chl *t*, chl *a*/ chl *b*)

|                               | <b>chl <i>a</i></b><br><b>(mg g<sup>-1</sup>)</b> | <b>chl <i>b</i></b><br><b>(mg g<sup>-1</sup>)</b> | <b>chl <i>t</i></b><br><b>(mg g<sup>-1</sup>)</b> | <b>chl <i>a</i>/ chl <i>b</i></b> |
|-------------------------------|---------------------------------------------------|---------------------------------------------------|---------------------------------------------------|-----------------------------------|
| <b>Within-subject factors</b> |                                                   |                                                   |                                                   |                                   |
| Year                          | <b>0.000</b>                                      | <b>0.000</b>                                      | <b>0.000</b>                                      | <b>0.000</b>                      |
| Year x Soil                   | 0.947                                             | 0.987                                             | 0.980                                             | 0.949                             |
| Year x Foliar                 | 0.768                                             | 0.678                                             | 0.917                                             | 0.202                             |
| Year x Soil x Foliar          | 0.073                                             | 0.165                                             | 0.089                                             | 0.543                             |
| <b>Between-group factors</b>  |                                                   |                                                   |                                                   |                                   |
| Soil                          | 0.962                                             | 0.953                                             | 0.968                                             | 0.927                             |
| Foliar                        | 0.684                                             | 0.480                                             | 0.542                                             | 0.984                             |
| Soil x Foliar                 | 0.284                                             | 0.212                                             | 0.203                                             | 0.445                             |

Significant differences are marked in bold

Table S3. Results from repeated measures ANOVA of the effects of soil and foliar B fertilization throughout time (year) on yield, nut number and nut and kernel attributes (mass, length, width and thickness)

|                               | Yield<br>(t ha <sup>-1</sup> ) | Nut<br>number | Nut          |                |               |                   | Kernel       |                |               |                   |
|-------------------------------|--------------------------------|---------------|--------------|----------------|---------------|-------------------|--------------|----------------|---------------|-------------------|
|                               |                                |               | Mass<br>(g)  | Length<br>(mm) | Width<br>(mm) | Thickness<br>(mm) | Mass<br>(g)  | Length<br>(mm) | Width<br>(mm) | Thickness<br>(mm) |
| <b>Within-subject factors</b> |                                |               |              |                |               |                   |              |                |               |                   |
| Year                          | <b>0.000</b>                   | <b>0.000</b>  | <b>0.000</b> | <b>0.000</b>   | <b>0.000</b>  | <b>0.000</b>      | <b>0.000</b> | <b>0.000</b>   | <b>0.000</b>  | <b>0.000</b>      |
| Year x Soil                   | <b>0.016</b>                   | <b>0.000</b>  | <b>0.000</b> | <b>0.000</b>   | <b>0.000</b>  | <b>0.000</b>      | <b>0.000</b> | <b>0.000</b>   | <b>0.000</b>  | <b>0.000</b>      |
| Year x Foliar                 | 0.304                          | 0.114         | <b>0.009</b> | <b>0.002</b>   | <b>0.000</b>  | <b>0.000</b>      | <b>0.009</b> | <b>0.043</b>   | <b>0.000</b>  | <b>0.000</b>      |
| Year x Soil x Foliar          | 0.502                          | <b>0.000</b>  | <b>0.000</b> | <b>0.000</b>   | <b>0.000</b>  | <b>0.000</b>      | <b>0.048</b> | <b>0.036</b>   | <b>0.000</b>  | <b>0.000</b>      |
| <b>Between-group factors</b>  |                                |               |              |                |               |                   |              |                |               |                   |
| Soil                          | <b>0.046</b>                   | <b>0.000</b>  | <b>0.000</b> | <b>0.000</b>   | <b>0.000</b>  | <b>0.000</b>      | <b>0.000</b> | <b>0.000</b>   | <b>0.000</b>  | <b>0.000</b>      |
| Foliar                        | 0.483                          | <b>0.000</b>  | <b>0.000</b> | <b>0.000</b>   | <b>0.000</b>  | <b>0.024</b>      | <b>0.000</b> | <b>0.000</b>   | <b>0.000</b>  | <b>0.000</b>      |
| Soil x Foliar                 | 0.389                          | <b>0.000</b>  | <b>0.000</b> | <b>0.012</b>   | 0.066         | <b>0.000</b>      | <b>0.000</b> | <b>0.000</b>   | <b>0.049</b>  | <b>0.000</b>      |

Significant differences are marked in bold
